# Supplementary material for: Rapid and Sensitive Detection of Inactivated SARS-CoV-2 Virus via Fiber-Optic and Electrochemical Impedance Spectroscopy Based Aptasensors
Source: MDPI journal article supplement (doi:10.3390/bios14050231), 2024-05-07
Supplement: s1 [file s1]

Supplementary Information

# Rapid and Sensitive Detection of Inactivated SARS-CoV-2 Virus via Fiber-Optic and Electrochemical Impedance Spectroscopy Based Aptasensors

Can Xiao <sup>1,†</sup>, Nan Wang <sup>2,†</sup>, Yuechao Zhao <sup>1,†</sup>, Xuemei Liu <sup>1</sup>, Hui Li <sup>1</sup>, Aixue Huang <sup>1</sup>, Lin Wang <sup>1</sup>, Xinhui Lou <sup>2</sup>, Bo Gao <sup>1,\*</sup> and Ningsheng Shao <sup>1,\*</sup>

<sup>1</sup> Beijing Institute of Basic Medical Sciences, Beijing 100850, China; xiaocan@bmi.ac.cn (C.X.); zhaoyuechao@bmi.ac.cn (Y.Z.); liuxuemei@bmi.ac.cn (X.L.); lihui1@bmi.ac.cn (H.L.); huangaixue@bmi.ac.cn (A.H.); wanglin1@bmi.ac.cn (L.W.); gaobo1@bmi.ac.cn (B.G.); shaoningsheng@bmi.ac.cn (N.S.)

<sup>2</sup> Department of Chemistry, Capital Normal University, Xisanhuan North Road. 105, Beijing 100048, China; 2210702032@cnu.edu.cn (N.W.); xinhui100@cnu.edu.cn (X.L.)

\* Correspondence: gaobo1@bmi.ac.cn (B.G.); shaoningsheng@bmi.ac.cn (N.S.)

† These authors contributed equally to this work.

**Table S1.** The sequences of DNA used in this research.

| Name           | Sequence (5'-3')                                                                                                     | Description                                                      |
|----------------|----------------------------------------------------------------------------------------------------------------------|------------------------------------------------------------------|
| GP35           | GCAATGGTACGGTACTTCC-N35-CAAAAGTGCACGCTACTT<br>TGCTAA                                                                 | Initial library used in MCP-SELEX for aptamer selection          |
| 5N10-6.9       | NH <sub>2</sub> -AAAAAAAAAAAA-<br>GCAATGGTACGGTACTTCCATGGCTGGTGCTTGAGGTGTG<br>TGTGGGGGTAGGGCCAAAAGTGCACGCTACTTTGCTAA | Amino group and spacer modified aptamer 6.9 for FOEW aptasensor  |
| Cy5.5-6.9-18-3 | Cy5.5- CCACACACACCT                                                                                                  | Cy5.5 modified complementary short chain used in FOEW aptasensor |
| HS-6.9         | SH-3(iSp18)-<br>GCAATGGTACGGTACTTCCATGGCTGGTGCTTGAGGTGTG<br>TGTGGGGGTAGGGCCAAAAGTGCACGCTACTTTGCTAA                   | Thiolated aptamer 6.9 for EIS aptasensor                         |
| A20s           | GGACCAGTTGTCTTTTCGGTCTCTACCCAGCCCGT                                                                                  | Specific aptamer against inactivated H1N1                        |

**Table S2.** The inputs of libraries and inactivated SARS-CoV-2 in each round of MCP-SELEX.

| Round           | Input library (pmol) | Input inactivated SARS-CoV-2 (μg) |
|-----------------|----------------------|-----------------------------------|
| 1 <sup>st</sup> | 1000                 | 1                                 |
| 2 <sup>nd</sup> | 129                  | 1                                 |
| 3 <sup>rd</sup> | 62                   | 1                                 |
| 4 <sup>th</sup> | 50                   | 1                                 |
| 5 <sup>th</sup> | 52                   | 1                                 |
| 6 <sup>th</sup> | 10                   | 1                                 |

**Table S3.** The sequences of the 10 candidate aptamers.

| Name of candidate aptamers | Sequence (5'-3')                                                                   |
|----------------------------|------------------------------------------------------------------------------------|
| 6.1                        | GCAATGGTACGGTACTTCCCTGGATGGCGTTGTCTGTGTGTTTGCTGATCAA<br>AAGTGCACGCTACTTTGCTAA      |
| 6.2                        | GCAATGGTACGGTACTTCCTATGGCGATGTGTTGGCTGTGTGTGGGGTGCAA<br>AAGTGCACGCTACTTTGCTAA      |
| 6.3                        | GCAATGGTACGGTACTTCCGGTCTGGTTAGGTGTTGGGCATGGTGGTTGCTT<br>TCCAAAAGTGCACGCTACTTTGCTAA |
| 6.4                        | GCAATGGTACGGTACTTCCACCTTGGCCTCCAAAAGTGCACGCTACTTTGC<br>TAA                         |
| 6.5                        | GCAATGGTACGGTACTTCCACGATGGTGAGGGCTGTGTTGTTACCAAAAGTG<br>CACGCTACTTTGCTAA           |
| 6.6                        | GCAATGGTACGGTACTTCCCTCCGGAATTATCTGATGCCCGCTCCAAAAGTG<br>CACGCTACTTTGCTAA           |
| 6.7                        | GCAATGGTACGGTACTTCCTGTGGCGAGGTAGGTGGGGTGTGTGTGTATCCA<br>AAAGTGCACGCTACTTTGCTAA     |
| 6.8                        | GCAATGGTACGGTACTTCCCGGGGCGGGCTGTCATGCCCATCCTACCGTGAC<br>CGCAAAAGTGCACGCTACTTTGCTAA |
| 6.9                        | GCAATGGTACGGTACTTCCATGGCTGGTGTGAGGTGTGTGTGGGGGTAGG<br>GCCAAAAGTGCACGCTACTTTGCTAA   |
| 6.10                       | CAATGGTACGGTACTTCCGGAGGGACTTGGAACGGTTGTAGGTGGTTCCAAA<br>AGTGCACGCTACTTTGCTAA       |

**Table S4.** The complementary short chains used for the optimization of the FOEW aptasensor.

| Name     | Length   | Sequence (5'-3')     |
|----------|----------|----------------------|
| 6.9-17   | 20 bases | ACACCTCAAGCACCAGCCAT |
| 6.9-18   | 20 bases | ACCCCCACACACACCTCAAG |
| 6.9-19   | 20 bases | TTTTGGCCCTACCCCCACAC |
| 6.9-18-1 | 18 bases | CCCCACACACACCTCAA    |
| 6.9-15   | 16 bases | CCCCACACACACCTCA     |
| 6.9-18-2 | 14 bases | CCCACACACACCTC       |
| 6.9-18-3 | 12 bases | CCACACACACCT         |
| 6.9-18-4 | 10 bases | CACACACACC           |
| 6.9-18-5 | 8 bases  | ACACACAC             |
| 6.9-18-6 | 6 bases  | CACACA               |

**Table S5.** Determination of the spiked SARS-CoV-2 recovery rate by using the FOEW aptasensor.

| Spiked inactivated SARS-CoV-2 (ng/mL) | Found (ng/mL) | Recovery (%) | Average Recovery (%) |
|---------------------------------------|---------------|--------------|----------------------|
| 0.5                                   | 0.48          | 95           | 98.7                 |
|                                       | 0.51          | 102          |                      |
|                                       | 0.49          | 99           |                      |
|                                       | 4.40          | 88           |                      |
| 5                                     | 5.43          | 109          | 95.7                 |
|                                       | 4.47          | 90           |                      |

**Table S6.** Calculated values of elements in the equivalent circuit (Figure 5B) in the following interfacial processes for the establishment of the EIS aptasensor.

| Processes                       | $R_{\Omega} (\Omega)$ | $R_{ct} (k\Omega)$ | $C (\mu F)$ | $W (k\Omega \cdot s^{1/2})$ |
|---------------------------------|-----------------------|--------------------|-------------|-----------------------------|
| Bare gold electrode             | 23                    | 0.053              | 85          | -                           |
| modification of aptamers        | 23                    | 0.27               | 18          | 3.3                         |
| Blocking with MCH               | 24                    | 1.6                | 0.58        | 7.9                         |
| SARS-CoV-2 (1 ng/mL) incubation | 25                    | 0.98               | 0.67        | 7.6                         |

**Table S7.** Calculated values of elements in the equivalent circuit (Figure 5C) for the establishment of the calibration plot.

| SARS-CoV-2 (g/mL)   | $R_{\Omega} (\Omega)$ | $R_{ct} (k\Omega)$ | $C (\mu F)$ | $W (k\Omega \cdot s^{1/2})$ |
|---------------------|-----------------------|--------------------|-------------|-----------------------------|
| 0                   | 24                    | 1.6                | 0.58        | 7.9                         |
| $1 \times 10^{-14}$ | 24                    | 1.5                | 0.58        | 8.7                         |
| $1 \times 10^{-13}$ | 24                    | 1.4                | 0.58        | 8.5                         |
| $1 \times 10^{-12}$ | 25                    | 1.3                | 0.60        | 8.4                         |
| $1 \times 10^{-11}$ | 25                    | 1.2                | 0.61        | 7.4                         |
| $1 \times 10^{-10}$ | 25                    | 1.1                | 0.63        | 7.4                         |
| $1 \times 10^{-9}$  | 25                    | 0.98               | 0.67        | 7.6                         |
| $1 \times 10^{-8}$  | 25                    | 0.88               | 0.70        | 5.1                         |
| $1 \times 10^{-7}$  | 25                    | 0.77               | 0.69        | 4.8                         |
| $1 \times 10^{-6}$  | 25                    | 0.76               | 0.71        | 4.3                         |

**Table S8.** Determination of the spiked SARS-CoV-2 recovery rate by using the EIS aptasensor.

| Spiked inactivated SARS-CoV-2 (pg/mL) | Found (pg/mL) | Recovery (%) | Average Recovery (%) |
|---------------------------------------|---------------|--------------|----------------------|
| 2                                     | 1.90          | 95           | 90.7                 |
|                                       | 1.48          | 74           |                      |
|                                       | 2.06          | 103          |                      |
|                                       | 1.65          | 82           |                      |
| 20                                    | 1.83          | 91           | 88.7                 |
|                                       | 1.85          | 93           |                      |

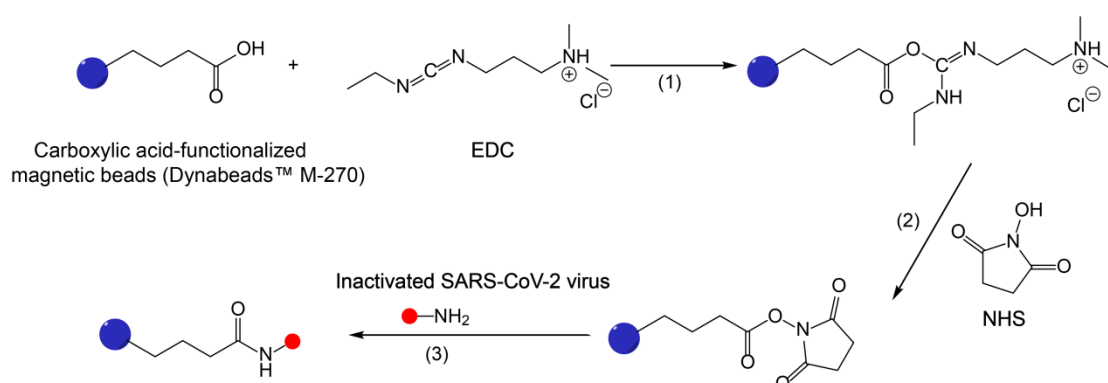

**Figure S1.** The EDC/NHS mediated crosslinking reaction between carboxylic acid-functionalized magnetic beads and the inactivated SARS-CoV-2 viruses.

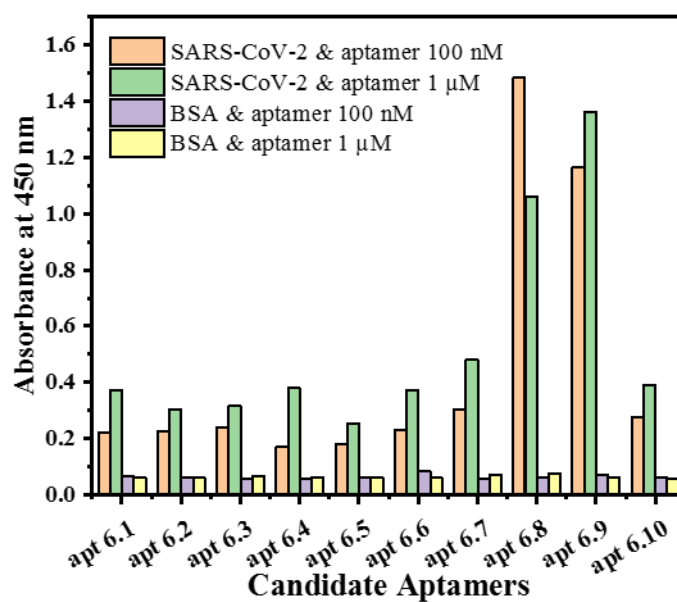

**Figure S2.** Binding affinity and specificity screening of the 10 candidate aptamers against inactivated SARS-CoV-2 with ELONA.

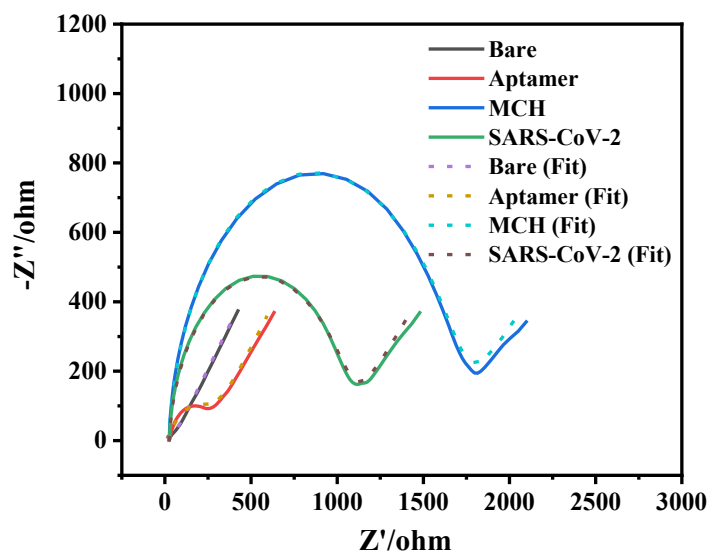

**Figure S3.** The experimental (lines) and simulated (dot lines) Nyquist plots of interfacial processes for the establishment of the EIS aptasensor (modified with aptamer 6.9 and its response to 1 ng/mL inactivated SARS-CoV-2).
